# Supplementary material
Source: MDPI journal article supplement (https://www.mdpi.com/2306-5338/8/3/98)
Supplement: s1 [file s1]

## Supplementary

### Supplementary Section 1: Dataset

| Raw Sediment Weight Data |           |       |        |        |        |       |       |        |
|--------------------------|-----------|-------|--------|--------|--------|-------|-------|--------|
| Sediment<br>Size         | sieve #   | 18    | 40     | 60     | 100    | 140   | 230   | fines  |
|                          | Phi       | 0     | 1.234  | 2      | 2.737  | 3.238 | 4     | >4     |
| Sediment Weight (g)      | mm        | 1     | 0.425  | 0.25   | 0.15   | 0.106 | 0.063 | <0.063 |
|                          | Control 1 | 1.287 | 12.290 | 22.177 | 7.707  | 0.907 | 0.133 | 0.400  |
|                          | Control 2 | 0.163 | 1.377  | 2.650  | 1.607  | 0.263 | 0.270 | 0.160  |
|                          | Control 3 | 1.700 | 32.670 | 31.757 | 16.797 | 1.973 | 0.407 | 33.680 |
|                          | Open 1    | 0.000 | 0.247  | 0.690  | 1.177  | 0.287 | 0.123 | 0.510  |
|                          | Open 2    | 0.060 | 0.317  | 1.133  | 1.363  | 0.250 | 0.130 | 0.030  |
|                          | Open3     | 0.100 | 0.077  | 0.390  | 0.697  | 0.177 | 0.037 | 0.317  |
|                          | Halfway 1 | 0.040 | 0.130  | 0.560  | 0.620  | 0.057 | 0.040 | 0.017  |
|                          | Halfway 2 | 0.023 | 0.087  | 0.313  | 0.433  | 0.123 | 0.083 | 0.197  |
|                          | Halfway 3 | 0.090 | 0.440  | 0.870  | 0.883  | 0.190 | 0.087 | 0.287  |
|                          | Closed 1  | 0.217 | 0.827  | 0.803  | 0.753  | 0.203 | 0.727 | 0.330  |
|                          | Closed 2  | 0.053 | 0.493  | 0.917  | 0.507  | 0.050 | 0.127 | 0.400  |
|                          | Closed 3  | 0.233 | 1.310  | 2.110  | 1.207  | 0.217 | 0.140 | 0.453  |

### Supplementary Section 2: Bootstrap Tables

Sup. Table S1: Bootstrap resampling of the control sample with grain size of phi = 0 (1 mm)

|                 | C1 (weight)  | C2 (weight)  | C3 (weight) |
|-----------------|--------------|--------------|-------------|
| <b>Measured</b> | <b>1.287</b> | <b>0.163</b> | <b>1.7</b>  |
| Resample 1      | 1.287        | 0.163        | 0.163       |
| Resample 2      | 1.7          | 1.7          | 1.7         |
| Resample 3      | 1.287        | 0.163        | 1.287       |
| .               | .            | .            | .           |
| .               | .            | .            | .           |
| .               | .            | .            | .           |
| Resample 5000   | 0.163        | 1.287        | 1.7         |

Sup. Table S2: Bootstrap sample weights

|               | Sum 1<br>$\varphi = 0$<br>(1mm) | Sum 2<br>$\varphi = 1.23$<br>(0.425mm) | Sum 3<br>$\varphi = 2$<br>(0.25mm) | Sum 4<br>$\varphi = 2.74$<br>(0.15mm) | Sum 5<br>$\varphi = 3.24$<br>(0.106mm) | Sum 6<br>$\varphi = 4$<br>(0.063mm) | Sum 7<br>$\varphi > 4$<br>( $<0.063$ mm) | Total<br>Sample<br>Weight |
|---------------|---------------------------------|----------------------------------------|------------------------------------|---------------------------------------|----------------------------------------|-------------------------------------|------------------------------------------|---------------------------|
| Measured      | 3.15                            | 46.336                                 | 56.58                              | 26.108                                | 3.142                                  | 0.8099                              | 34.24                                    | 170.37                    |
| Resample 1    | 1.613                           | 25.956                                 | ..                                 | ..                                    | ..                                     | ..                                  | ..                                       | 109.8                     |
| Resample 2    | 5.1                             | 57.25                                  | ..                                 | ..                                    | ..                                     | ..                                  | ..                                       | 243.92                    |
| Resample 3    | 2.737                           | 35.42                                  | ..                                 | ..                                    | ..                                     | ..                                  | ..                                       | 153.04                    |
| .             | .                               | .                                      | .                                  | .                                     | .                                      | .                                   | .                                        |                           |
| .             | .                               | .                                      | .                                  | .                                     | .                                      | .                                   | .                                        |                           |
| .             | .                               | .                                      | .                                  | .                                     | .                                      | .                                   | .                                        |                           |
| Resample 5000 | 3.15                            | 15.042                                 | .                                  | .                                     | .                                      | .                                   | .                                        | 146.2                     |

Sup. Table S3: Bootstrapped proportions

|               | Prop 1<br>$\varphi = 0$<br>(1mm) | Prop 2<br>$\varphi = 1.23$<br>(0.425mm) | Prop 3<br>$\varphi = 2$<br>(0.25mm) | Prop 4<br>$\varphi = 2.74$<br>(0.15mm) | Prop 5<br>$\varphi = 3.24$<br>(0.106mm) | Prop 6<br>$\varphi = 4$<br>(0.063mm) | Prop 7<br>$\varphi > 4$<br>( $<0.063$ mm) |
|---------------|----------------------------------|-----------------------------------------|-------------------------------------|----------------------------------------|-----------------------------------------|--------------------------------------|-------------------------------------------|
| Measured      | 0.0185                           | 0.272                                   | 0.332                               | 0.153                                  | 0.0184                                  | 0.005                                | 0.2                                       |
| Resample 1    | 0.0093                           | 0.15                                    | ..                                  | ..                                     | ..                                      | ..                                   | ..                                        |
| Resample 2    | 0.0274                           | 0.31                                    | ..                                  | ..                                     | ..                                      | ..                                   | ..                                        |
| Resample 3    | 0.023                            | 0.299                                   | ..                                  | ..                                     | ..                                      | ..                                   | ..                                        |
| .             | .                                | .                                       | .                                   | .                                      | .                                       | .                                    | .                                         |
| .             | .                                | .                                       | .                                   | .                                      | .                                       | .                                    | .                                         |
| .             | .                                | .                                       | .                                   | .                                      | .                                       | .                                    | .                                         |
| Resample 5000 | 0.026                            | 0.34                                    | .                                   | .                                      | .                                       | .                                    | .                                         |

### Supplementary Section 3: Tukey's 'Honest Significant Difference'

A set of confidence intervals on the differences between the means of different grain size with the specified family-wise probability of coverage. The intervals are based on the Studentized range statistic, Tukey's 'Honest Significant Difference' method.

**Sup. Table S4: Tukey's Confidence Interval for Control Setting**

|       | diff     | lwr      | upr      | p adj    |
|-------|----------|----------|----------|----------|
| s1-s5 | 0.002412 | 0.000263 | 0.004561 | 0.016317 |
| s6-s5 | 0.042832 | 0.040683 | 0.044981 | 0        |
| s7-s5 | 0.059939 | 0.05779  | 0.062088 | 0        |
| s4-s5 | 0.165343 | 0.163194 | 0.167492 | 0        |
| s2-s5 | 0.178904 | 0.176755 | 0.181053 | 0        |
| s3-s5 | 0.274949 | 0.2728   | 0.277098 | 0        |
| s6-s1 | 0.04042  | 0.038271 | 0.042569 | 0        |
| s7-s1 | 0.057528 | 0.055378 | 0.059677 | 0        |
| s4-s1 | 0.162931 | 0.160782 | 0.16508  | 0        |
| s2-s1 | 0.176492 | 0.174343 | 0.178641 | 0        |
| s3-s1 | 0.272537 | 0.270388 | 0.274686 | 0        |
| s7-s6 | 0.017107 | 0.014958 | 0.019256 | 0        |
| s4-s6 | 0.122511 | 0.120362 | 0.12466  | 0        |
| s2-s6 | 0.136072 | 0.133923 | 0.138221 | 0        |
| s3-s6 | 0.232117 | 0.229968 | 0.234266 | 0        |
| s4-s7 | 0.105404 | 0.103255 | 0.107553 | 0        |
| s2-s7 | 0.118964 | 0.116815 | 0.121114 | 0        |
| s3-s7 | 0.215009 | 0.21286  | 0.217158 | 0        |
| s2-s4 | 0.013561 | 0.011412 | 0.01571  | 0        |
| s3-s4 | 0.109606 | 0.107457 | 0.111755 | 0        |
| s3-s2 | 0.096045 | 0.093896 | 0.098194 | 0        |

**Sup. Table S5: Tukey's Confidence Interval for Closed Setting**

|       | diff     | lwr      | upr      | p adj    |
|-------|----------|----------|----------|----------|
| s1-s5 | 0.002412 | 0.000263 | 0.004561 | 0.016317 |
| s6-s5 | 0.042832 | 0.040683 | 0.044981 | 0        |
| s7-s5 | 0.059939 | 0.05779  | 0.062088 | 0        |
| s4-s5 | 0.165343 | 0.163194 | 0.167492 | 0        |
| s2-s5 | 0.178904 | 0.176755 | 0.181053 | 0        |
| s3-s5 | 0.274949 | 0.2728   | 0.277098 | 0        |
| s6-s1 | 0.04042  | 0.038271 | 0.042569 | 0        |
| s7-s1 | 0.057528 | 0.055378 | 0.059677 | 0        |
| s4-s1 | 0.162931 | 0.160782 | 0.16508  | 0        |
| s2-s1 | 0.176492 | 0.174343 | 0.178641 | 0        |
| s3-s1 | 0.272537 | 0.270388 | 0.274686 | 0        |
| s7-s6 | 0.017107 | 0.014958 | 0.019256 | 0        |
| s4-s6 | 0.122511 | 0.120362 | 0.12466  | 0        |
| s2-s6 | 0.136072 | 0.133923 | 0.138221 | 0        |
| s3-s6 | 0.232117 | 0.229968 | 0.234266 | 0        |
| s4-s7 | 0.105404 | 0.103255 | 0.107553 | 0        |
| s2-s7 | 0.118964 | 0.116815 | 0.121114 | 0        |
| s3-s7 | 0.215009 | 0.21286  | 0.217158 | 0        |
| s2-s4 | 0.013561 | 0.011412 | 0.01571  | 0        |
| s3-s4 | 0.109606 | 0.107457 | 0.111755 | 0        |
| s3-s2 | 0.096045 | 0.093896 | 0.098194 | 0        |

Sup. Table S6: Tukey's Confidence Interval for Halfway Setting

|       | diff     | lwr      | upr      | p adj |
|-------|----------|----------|----------|-------|
| s6-s1 | 0.010148 | 0.007996 | 0.0123   | 0     |
| s5-s1 | 0.039128 | 0.036976 | 0.041281 | 0     |
| s7-s1 | 0.061358 | 0.059206 | 0.06351  | 0     |
| s2-s1 | 0.088633 | 0.086481 | 0.090785 | 0     |
| s3-s1 | 0.285305 | 0.283152 | 0.287457 | 0     |
| s4-s1 | 0.321205 | 0.319053 | 0.323357 | 0     |
| s5-s6 | 0.028981 | 0.026828 | 0.031133 | 0     |
| s7-s6 | 0.05121  | 0.049058 | 0.053362 | 0     |
| s2-s6 | 0.078485 | 0.076333 | 0.080637 | 0     |
| s3-s6 | 0.275157 | 0.273005 | 0.277309 | 0     |
| s4-s6 | 0.311057 | 0.308905 | 0.313209 | 0     |
| s7-s5 | 0.02223  | 0.020078 | 0.024382 | 0     |
| s2-s5 | 0.049505 | 0.047352 | 0.051657 | 0     |
| s3-s5 | 0.246176 | 0.244024 | 0.248328 | 0     |
| s4-s5 | 0.282077 | 0.279924 | 0.284229 | 0     |
| s2-s7 | 0.027275 | 0.025123 | 0.029427 | 0     |
| s3-s7 | 0.223946 | 0.221794 | 0.226099 | 0     |
| s4-s7 | 0.259847 | 0.257695 | 0.261999 | 0     |
| s3-s2 | 0.196672 | 0.194519 | 0.198824 | 0     |
| s4-s2 | 0.232572 | 0.23042  | 0.234724 | 0     |
| s4-s3 | 0.0359   | 0.033748 | 0.038052 | 0     |

Sup. Table S7: Tukey's Confidence Interval for Open Setting

|       | diff     | lwr      | upr      | p adj |
|-------|----------|----------|----------|-------|
| s6-s1 | 0.016165 | 0.014189 | 0.01814  | 0     |
| s2-s1 | 0.058768 | 0.056792 | 0.060743 | 0     |
| s5-s1 | 0.068857 | 0.066882 | 0.070833 | 0     |
| s7-s1 | 0.083974 | 0.081999 | 0.08595  | 0     |
| s3-s1 | 0.253776 | 0.251801 | 0.255752 | 0     |
| s4-s1 | 0.378436 | 0.37646  | 0.380411 | 0     |
| s2-s6 | 0.042603 | 0.040627 | 0.044578 | 0     |
| s5-s6 | 0.052692 | 0.050717 | 0.054668 | 0     |
| s7-s6 | 0.06781  | 0.065834 | 0.069785 | 0     |
| s3-s6 | 0.237611 | 0.235636 | 0.239587 | 0     |
| s4-s6 | 0.362271 | 0.360295 | 0.364247 | 0     |
| s5-s2 | 0.010089 | 0.008114 | 0.012065 | 0     |
| s7-s2 | 0.025207 | 0.023231 | 0.027182 | 0     |
| s3-s2 | 0.195009 | 0.193033 | 0.196984 | 0     |
| s4-s2 | 0.319668 | 0.317693 | 0.321644 | 0     |
| s7-s5 | 0.015117 | 0.013142 | 0.017093 | 0     |
| s3-s5 | 0.184919 | 0.182944 | 0.186895 | 0     |
| s4-s5 | 0.309579 | 0.307603 | 0.311554 | 0     |
| s3-s7 | 0.169802 | 0.167826 | 0.171777 | 0     |
| s4-s7 | 0.294461 | 0.292486 | 0.296437 | 0     |
| s4-s3 | 0.12466  | 0.122684 | 0.126635 | 0     |
